1 **Antibody response after a single dose of BBV152 vaccine negatively correlates**  
2 **with pre-existing antibodies and induces a significant but low levels of neutralizing**  
3 **antibodies to Omicron variant**

4 **Running title:** Antibody response by BBV152 vaccine

5  
6 Suman Das<sup>1\*</sup>, Janmejay Singh<sup>2\*</sup>, Heena Shaman<sup>2\*</sup>, Balwant Singh<sup>2</sup>, Anbalagan  
7 Anantharaj<sup>2</sup>, Patil Sharanabasava<sup>2</sup>, Rajesh Pandey<sup>3</sup>, Rakesh Lodha<sup>4</sup>, Anil Kumar  
8 Pandey<sup>1</sup> and Guruprasad R. Medigeshi<sup>2#</sup>

9 1: Employees State Insurance Corporation Medical College and Hospital, Faridabad,  
10 Haryana, INDIA.

11 2: Translational Health Science and Technology Institute, Faridabad, Haryana. INDIA.

12 3: INtegrative GENomics of HOst-PathogEn (INGEN-HOPE) laboratory, CSIR-Institute of  
13 Genomics and Integrative Biology, Delhi, INDIA.

14 4: All India Institute of Medical Sciences, New Delhi, INDIA.

15

16 **\* These authors contributed equally**

17 **# Corresponding author:**

18 Guruprasad R. Medigeshi, PhD

19 Translational Health Science and Technology Institute,

20 P.O. Box # 4, Faridabad-Gurgaon Highway,

21 Faridabad 121001. INDIA.

22 Tel: +91-0129-2876311. Email: [gmedigeshi@thsti.res.in](mailto:gmedigeshi@thsti.res.in)

23

24 **ABSTRACT**

25 Most adults in India have received at least one dose of COVID-19 vaccine and also been  
26 infected naturally during the pandemic. As immunization of individuals continues under  
27 this situation where the virus has attained endemicity, we assessed whether this hybrid  
28 immunity is further boosted by a single dose of BBV152, an inactivated SARS-CoV-2  
29 vaccine, and, if these antibodies can neutralize SARS-CoV-2 delta and omicron variants.  
30 We found that natural infection during the second wave in 2021 led to generation of  
31 neutralizing antibodies against other lineages of SARS-CoV-2 including the omicron  
32 variant, albeit at a significantly lower level for the latter. A single dose of BBV152 boosted  
33 antibody titers against the delta and the omicron variants but the antibody levels remained  
34 low for the omicron variant. Boosting of antibodies showed negative correlation with  
35 baseline neutralizing antibody titers suggesting anergy of the immune system in  
36 individuals with high levels of antibodies.

37

38 **KEYWORDS:** SARS-CoV-2; FRNT; ELISA; RBD; Delta; Omicron

39

## 40 **INTRODUCTION**

41 Serosurveillance studies have showed that 69% of the Indian population had antibodies  
42 for COVID-19 after the second wave<sup>1</sup> and a subsequent serosurvey from Delhi showed  
43 seropositivity of over 90%<sup>2</sup> suggesting that India was/is a heterogenous mix of people  
44 with immunity to COVID-19 due to vaccination or natural infection or both after the second  
45 wave. As COVID-19 has attained a state of endemicity and majority of the population got  
46 vaccinated after the second wave, there have been no studies to measure the impact of  
47 pre-existing humoral immunity on subsequent vaccination. As antibody levels wane and  
48 the risk of reinfection with the same variant and or a new variant warrants booster  
49 vaccination, it is imperative to understand the efficiency of boosting vis-à-vis pre-existing  
50 antibody levels. We enrolled subjects who got vaccinated with BBV152 as part of routine  
51 vaccination program and assessed the effect of pre-existing antibody levels on boosting  
52 after receiving a single dose of vaccine. We found that majority of the individuals had  
53 neutralizing antibodies to delta variant and natural infection with delta variant led to  
54 generation of neutralizing antibodies against other lineages of SARS-CoV-2 including the  
55 omicron variant although the level of antibodies was significantly lower for this new variant  
56 of concern as compared to delta and ancestral virus.

57

## 58 **METHODS**

### 59 **Human Ethics**

60 The study was approved by the Institutional ethics committees for human research at  
61 ESIC Hospital and Medical College and THSTI. Informed consent was obtained from all  
62 the participants.

63

## 64 **Human Samples**

65 *BBV152 cohort*: An informed consent was obtained in person from each participant before  
66 they were being recruited in this study at the ESIC Medical College & Hospital, Faridabad  
67 between May – August 2021. All adults of > 18 years of age who came for the first dose  
68 of vaccine were eligible to participate in this study including those who had recovered  
69 from the COVID-19 in the recent past. In addition, participants were requested to provide  
70 any history related to COVID-19 infection. Blood samples of the participants were  
71 collected in anti-coagulant free vacutainers with the help of a professional phlebotomist  
72 and stored at 2 - 8 °C. First blood sample (5 ml) was collected on day 1 prior to the  
73 administration of the first dose of the vaccine. Second blood sample (5 ml) was collected  
74 during the follow-up visit before the administration of the second dose of the vaccine.

75

## 76 **Cells**

77 Vero E6 cells were obtained from European Collection of Authenticated Cell Cultures and  
78 maintained in Minimal essential medium (MEM) (Gibco) supplemented with 10% heat-  
79 inactivated fetal bovine serum (FBS), 100U of penicillin and 100 µg of streptomycin and  
80 L-glutamine (PSG) (Gibco), 1X non-essential amino acid mix (NEAA) (Gibco), 25 mM  
81 HEPES in 5% CO<sub>2</sub> incubator. Calu-3 cells (Human lung epithelial cells derived from  
82 adenocarcinoma: ATCC-HTB-55) were maintained in Dulbecco's minimal essential  
83 medium (DMEM) (HiMedia) supplemented with 10% heat-inactivated fetal bovine serum  
84 (FBS), 100U of penicillin and 100 µg of streptomycin and L-glutamine (PSG) (Gibco), 1X  
85 non-essential amino acid (NEAA) (Gibco),

86

## 87 **Viruses**

88 SARS-CoV-2 to B.6 and delta lineage virus isolation has been described earlier<sup>3-5</sup>. SARS-  
89 CoV-2 Omicron isolate (sub-lineage BA.1) was obtained from Leo Poon<sup>6</sup>. SARS-CoV-2  
90 variants were propagated in Vero E6 cells or Calu-3 cells<sup>7</sup> and virus passaging was limited  
91 to four passages. All virus stocks used in this study was verified by whole genome  
92 sequencing using total RNA sample of the culture on Nanopore sequencing platform as  
93 described previously to confirm the variant<sup>8</sup>.

94

## 95 **Quantitative Nucleoprotein ELISA**

96 The bacterial expression plasmid pET-28a(+) containing the codon optimized  
97 nucleocapsid (N) gene from severe acute respiratory syndrome-related coronavirus 2  
98 (SARS-CoV-2), Wuhan-Hu-1 (GenBank: MN908947) having N-terminal hexa-histidine  
99 affinity purification tag was requested from BEI resources (NR-53507). His-tagged N  
100 protein was purified by Ni-NTA chromatography as per previous report<sup>9</sup>. 96-well  
101 MaxiSorp ELISA plates (Nunc) were coated with 1 µg/mL purified N protein diluted in 1X  
102 PBS pH 7.4 and the plates were incubated for 1 h at room temperature (RT). Serum  
103 samples were inactivated using Triton X-100 (Sigma) to a final concentration of 1 % at  
104 RT for 1 h. The serum samples were two-fold serially diluted starting from 1:100 to 1:  
105 6400 and 100 µl/well was added to the antigen-coated plate. After 30 min at room  
106 temperature, the plate was washed using 1X PBST (phosphate-buffered saline with 0.1  
107 % Tween 20). After washing, 50 µl/well HRP-conjugated anti-human IgG was added and  
108 incubated at room temperature for 30 min. 100 µl/well of TMB substrate was added for

109 10 min and the reaction was terminated using 1M H<sub>2</sub>SO<sub>4</sub> as stop solution. The intensity  
110 of the color was quantified by measuring absorbance in a microplate reader at 450 nm  
111 with 630 nm as reference wavelength. Antibody concentrations were calculated for each  
112 sample dilution by interpolation of the OD values on the 4-parameter logistic (4-PL)  
113 standard curve from in-house reference control (calibrated as a secondary standard using  
114 WHO reference standard reagent (20/130)) and adjusted according to their corresponding  
115 dilution factor using Gen5 software. The assay has a limit of quantitation of 3 binding  
116 antibody units/mL (BAU/mL). This assay has been validated in-house and accredited  
117 under ISO17025:2017 standard.

118

#### 119 **Quantitative RBD ELISA**

120 Recombinant spike protein receptor binding domain (RBD) ELISA was performed as  
121 described earlier<sup>4,10</sup>. Recombinant spike protein Receptor Binding Domain (RBD) antigen  
122 of SARS-CoV-2 were coated onto 96-well polystyrene plate (0.1µg/well) and incubate  
123 coated plate at 4°C for 18-22 hours. Antigen-coated plates were washed with wash buffer  
124 and incubated by adding 200 µl of blocking buffer (5% non-fat dry milk powder in PBST).  
125 Serum samples were inactivated by adding 10 µl of 10% Triton X-100 in 90 µl serum to  
126 obtain a final concentration of 1% Triton X-100. Samples were gently mixed and  
127 incubated at room temperature for 1 hour. After washing the plate with wash buffer, 100  
128 µl of diluted serum (1:50-1:6400 diluted in blocking buffer) was added to each well and  
129 incubated at RT (23±2°C) for 30 ± 10 min. Substrate was added and OD was recorded  
130 and data was analyzed as described in the previous section. The assay has a limit of

131 quantitation of 12 binding antibody units/mL (BAU/mL). This assay has been validated in-  
132 house and accredited under ISO17025:2017 standard.

133

#### 134 **Virus microneutralization assay**

135 Virus microneutralization assay by focus reduction neutralization titer assay using  
136 indicating virus isolates was performed as described earlier with minor modifications in  
137 omicron variant staining<sup>7</sup>. Briefly, serum samples were serially diluted from 1:20 to 1:640  
138 and virus neutralization was tested in Vero E6 cells. Cells were incubated for 24 hours for  
139 ancestral (B.6) and Delta (B.1.617.2) variants and for 32 hours for Omicron (B.1.1.529)  
140 variant. After incubation, cells were fixed with formaldehyde solution and then stained  
141 with anti-spike RBD rabbit polyclonal antibody at 1:2000 dilution (Sino Biologicals, Cat.  
142 No. 40592-T62) for 1 h, followed by HRP-conjugated anti-rabbit antibody at 1:4000  
143 dilution (Invitrogen, Cat. No. G-21234) for 1 h. For Omicron isolate, incubation was  
144 extended to 32 h and a 1:1000 dilution of anti-nucleocapsid primary antibody (Genscript,  
145 Cat. No. A02048-1) and 1:500 dilution of HRP-conjugated goat anti-mouse IgG secondary  
146 antibody (Invitrogen, Cat. No. A16072) was used for staining. Cells were washed with  
147 PBS and incubated with TrueBlue substrate (KPL inc, USA, Cat. No. 5510-0030) for 10  
148 minutes and washed with sterile MilliQ water. Microplaques developed after staining were  
149 quantified by AID iSPOT reader (AID GmbH, Strassberg, Germany). The raw data  
150 generated from the AID iSpot Analyser in a 96-well format is pasted in a pre-defined  
151 protocol template for calculation of FRNT<sub>50</sub> by using log<sub>10</sub> transformed dilution value and  
152 neutralization percentages in an XY format. The Point-to-Point curve fit using a linear  
153 equation to fit each pair of data points was used to calculate the FRNT<sub>50</sub> value. 50%

154 neutralization values were calculated using SoftMax Pro GxP software v7.7.1 (Molecular  
155 Devices).

156

### 157 **Statistical analysis**

158 Data was analysed and final graphs were prepared using GraphPad Prism (Version 9)  
159 software. Statistical significance was estimated by two-tailed, non-parametric Mann-  
160 Whitney test or Wilcoxon signed rank test as indicated.

161

## 162 **RESULTS**

163 We collected baseline blood sample at the time of vaccination and a follow-up sample  
164 four weeks later, before the second dose in the months of June-July 2021. A total of 94  
165 (37 females) subjects were enrolled. Median age of the subjects was 31.5 yrs (range: 18-  
166 67 yrs). Sixty-seven of 94 (71.3%) subjects were positive in a quantitative RBD-ELISA in  
167 the baseline sample. Four samples were indeterminate. We also measured the levels of  
168 nucleocapsid (N) antibodies by quantitative ELISA. Fifty five of the 94 (58.5%) samples  
169 were positive for N antibodies suggesting exposure in the second wave. After one dose  
170 of vaccination, positivity in RBD-ELISA increased to Eighty four of 94 samples (89.4%)  
171 and for N-ELISA 79 out of 94 samples (84%) were positive. The GMT of RBD antibodies  
172 increased significantly from 109 (95% CI: 76, 156) to 206 (95% CI: 163, 260) in baseline  
173 seropositive (Figure 1A) subjects, however, the increase in the GMT of N antibodies was  
174 from 18 (95% CI: 12, 25) to 25 (95% CI: 20, 31) which was not significant (Figure 1B).

175 We next measured the virus neutralizing antibody titers against the SARS-CoV-2  
176 B.6 lineage virus from 2020<sup>4</sup> (designated as WT) and B.1.617.2 (Delta variant) isolates in



177 both the baseline and post-single dose vaccination samples by focus reduction  
178 neutralization titer (FRNT) assay. Overall GMT of neutralizing antibodies increased after  
179 one dose of BBV152 vaccination for both WT virus and delta variant (Table 1). Both RBD  
180 and N antibody levels correlated with neutralization titers against the delta variant after  
181 the first dose (Supplementary Figure S1). The FRNT data were further analyzed based  
182 on the seropositivity status at baseline in RBD-ELISA and we found that one dose of  
183 BBV152 vaccine led to significant increase in GMT for neutralizing antibodies against the  
184 WT virus (Table 1 and Figure 1C). However, the GMT for delta variant showed a marginal  
185 and insignificant increase from 531.9 (95% CI: 371.6, 761.2) to 783.2 (95% CI: 624.8,  
186 981.7) in the RBD-ELISA positive subgroup at baseline (Table 1 and Figure 1C). Twenty-  
187 two out of 23 baseline RBD-ELISA negative samples showed the presence of neutralizing  
188 antibodies for WT and delta variant in FRNT assay, however, the levels of these  
189 antibodies were about 7-8 fold lower than that in the ELISA-positive samples (Table 1)  
190 suggesting that the antibody levels were below the level of detection of ELISA and these  
191 are not seronegative subjects. In samples collected from baseline RBD-ELISA negative  
192 participants, the GMT of antibodies against both the WT and B.1.617.2 lineage viruses  
193 increased significantly after receiving the first dose of the vaccine (Table 1 and Figure  
194 1D). Overall, we observed that samples with  $FRNT_{50} > 1000$  failed to show any induction  
195 in antibodies after the first dose. We observed a clear negative correlation between the  
196 baseline  $FRNT_{50}$  titer for delta variant and the fold change in titer values after a single  
197 dose of vaccination (Figure 1E).

198 While this study was in progress, omicron (B.1.1.529) emerged as a variant of  
199 concern and antibodies from most vaccines showed reduced efficiency in neutralizing this

200 variant<sup>7,11,12</sup>. We randomly selected 55 paired samples (which had a FRNT<sub>50</sub> value for the  
201 delta variant) to test for their ability to neutralize the omicron variant. Only twenty out of  
202 55 baseline samples had detectable levels of neutralizing antibodies against omicron. By  
203 assigning a FRNT<sub>50</sub> value of 10 for the samples which had no detectable levels of  
204 antibodies in the starting dilution (1:20) of the assay, we obtained a GMT of 22 (95% CI:  
205 16, 31) for these 55 samples. This value was 18-fold lower than the GMT of delta variant  
206 which was 404 (95% CI: 248, 658). After a single dose of BBV152, the number of samples  
207 positive for neutralizing antibodies against omicron increased to thirty six out of 55  
208 subjects with a significant increase in GMT ( $p = 0.0011$ ) to 52 (95% CI: 36, 75), however,  
209 this was still 15-fold lower than the GMT for delta variant which was 784 (95% CI: 575,  
210 1068) (Figure 1F and 1G). Whether the modest but significant boosting observed for  
211 omicron by BBV152 vaccination in seropositive individuals is protective or not warrants  
212 further studies from the ongoing booster vaccination campaign across the country.

213         Vaccination in early convalescent individuals led to poorer boosting as observed  
214 in other studies<sup>13-15</sup>. In naturally infected individuals, boosting after six months is predicted  
215 to increase the vaccine effectiveness against variants of concern<sup>16</sup>. We were not able to  
216 ascertain the exact date of past infection in most of these individuals which is not unusual  
217 as most COVID-19 infections are asymptomatic or mild and are not diagnosed.  
218 Nucleocapsid antibodies are known to decay with a half-life of 68 days<sup>17</sup> and 59% of our  
219 study participants were positive for N antibodies suggesting that they could have been  
220 infected with SARS-CoV-2 within the past 6-8 months. Therefore, we cannot rule out the  
221 possibility that some of the subjects with high antibody titers were in their early  
222 convalescence and therefore, the boosting effect may not have been significant due to

223 energy of the immune system as has been observed in other studies<sup>18</sup>. Antibody boosting  
224 correlated negatively with the levels of pre-existing antibodies which indicates that a  
225 strategy is needed to prioritize high-risk individuals based on their antibody levels for  
226 booster vaccination. Nevertheless, the level of neutralizing antibodies for omicron variant  
227 after boosting in both seropositive and seronegative individuals remained much lower  
228 compared to the ancestral virus or the delta variant which is consistent with recent reports  
229 for CoronaVac, an inactivated vaccine<sup>19</sup>. However, the participants of our study were all  
230 non-vaccinated individuals and we cannot rule out the possibility that vaccination of these  
231 individuals after further reduction in antibody titers would have induced a better antibody  
232 response. It has been estimated that neutralizing antibodies are a good correlate of  
233 protection and contribute to about 60% of the protective efficacy of a vaccine which  
234 indicates that the cellular responses play a critical synergistic role along with antibodies  
235 in mediating protection from SARS-CoV-2 VoCs<sup>4,5,16</sup>. Some of the recent studies have  
236 also shown that heterologous boosting mounts a robust immune response to VoCs<sup>20</sup>. As  
237 many new vaccines are likely to be licensed in the coming months in India, more studies  
238 are required to measure the efficacy of homologous vs heterologous boosting against  
239 new variants of concern.

240

#### 241 **Data availability**

242 All the data are presented in this manuscript. Detailed Methods are available as online  
243 methods.

244

#### 245 **ACKNOWLEDGEMENTS**

246 We thank all the members of the bioassay lab for technical support. We thank Neha Garg  
247 and Shamsher Singh for data management. We thank all the participants who consented  
248 to enrol into the study.

249

## 250 **AUTHOR CONTRIBUTIONS**

251 JS, HS, BS, AA, and PS performed experiments and analyzed the data. SD and AKP  
252 coordinated the study at clinical site, generated all the clinical site data and contributed  
253 reagents. RP sequenced the virus isolates and analyzed the data. RL provided critical  
254 inputs in experimental design, data analysis and writing the manuscript. GRM and AKP  
255 conceived the study, designed the experiments and analyzed the data. GRM wrote the  
256 manuscript. All authors have reviewed and approved the final version of the manuscript.

257

## 258 **FUNDING INFORMATION**

259 This work was supported by the Department of Biotechnology (DBT) through IndCEPI  
260 Mission (BT/MB/CEPI/2016), Translational Research Program  
261 (BT/PR30159/MED/15/188/2018) and Global Immunology and Immune Sequencing for  
262 Epidemic Response (INV-030592). The funders had no role in study design, data  
263 collection and interpretation or the decision to submit the work for publication.

264

## 265 **CONFLICT OF INTEREST STATEMENT**

266 The authors have declared that no conflict of interest exists.

267

268

269 **Table 1: Virus neutralization titers post single-dose of BBV152 vaccination based**  
 270 **on RBD-ELISA positivity**

271

|                                                                                                                            | <b>Geometric Mean FRNT50 (95% CI)</b> |                                     |                                                                                                                                                                   |                                            |                                            |                                                                                                                                                                      |
|----------------------------------------------------------------------------------------------------------------------------|---------------------------------------|-------------------------------------|-------------------------------------------------------------------------------------------------------------------------------------------------------------------|--------------------------------------------|--------------------------------------------|----------------------------------------------------------------------------------------------------------------------------------------------------------------------|
| Sampling time                                                                                                              | Baseline<br><b>WT</b><br><b>(A)</b>   | One dose<br><b>WT</b><br><b>(B)</b> | P value<br>comparing<br>the titers<br>within each<br>group;<br>before and<br>after 1 dose<br>of vaccine<br>(A vs B)<br><b>(Wilcoxon<br/>signed<br/>rank test)</b> | Baseline<br><b>B.1.617.2</b><br><b>(C)</b> | One dose<br><b>B.1.617.2</b><br><b>(D)</b> | P value<br>comparing<br>the titers<br>within each<br>group;<br>before and<br>after 1<br>dose of<br>vaccine (C<br>vs D)<br><b>(Wilcoxon<br/>signed<br/>rank test)</b> |
| All (n=94)                                                                                                                 | 108.6<br>(81.3 –<br>145.1)            | 256.4<br>(196.1 –<br>335.3)         | <0.0001                                                                                                                                                           | 291.4<br>(209.6 – 405.0)                   | 508.1<br>(398.9 –647.2)                    | 0.0126                                                                                                                                                               |
| Groups based on<br>RBD ELISA<br>results                                                                                    |                                       |                                     |                                                                                                                                                                   |                                            |                                            |                                                                                                                                                                      |
| 1. RBD-<br>positive at<br>baseline<br>(n=67)                                                                               | 182.8<br>(133.6 –<br>250.0)           | 422.2<br>(340.5 –<br>523.5)         | 0.0001                                                                                                                                                            | 531.9<br>(371.6 – 761.2)                   | 783.2<br>(624.8 –<br>981.7)                | 0.448                                                                                                                                                                |
| 2. RBD-<br>Negative<br>at<br>baseline<br>(n=23)                                                                            | 26.50<br>(19.8 – 35.5)                | 57.32<br>(33.0 – 99.6)              | 0.0033                                                                                                                                                            | 63.94<br>(46.4 – 88.1)                     | 146.6<br>(95.7 – 224.7)                    | 0.0002                                                                                                                                                               |
| P value<br>comparing the<br>titers between 2<br>groups based on<br>RBD ELISA<br>(using <b>Wilcoxon<br/>rank sum test</b> ) | <0.0001                               | <0.0001                             |                                                                                                                                                                   | <0.0001                                    | <0.0001                                    |                                                                                                                                                                      |

272 Comparison of titers at baseline and 3-4 weeks after 1<sup>st</sup> dose was performed using Wilcoxon  
 273 signed rank test. Comparison of titers between the groups (based on RBD ELISA results) was  
 274 done using Wilcoxon rank sum test.

275

276 **REFERENCES**

- 277 1. Jahan, N., *et al.* Seroprevalence of IgG antibodies against SARS-CoV-2 in India,  
278 March 2020 to August 2021: a systematic review and meta-analysis. *Int J Infect*  
279 *Dis* **116**, 59-67 (2021).
- 280 2. Sharma, P., *et al.* SARS-CoV-2 seroprevalence in Delhi, India - September-  
281 October 2021 – a population based seroepidemiological study. *medRxiv*,  
282 2021.2012.2028.21268451 (2021).
- 283 3. Anantharaj, A., *et al.* Kinetics of viral load, immunological mediators and  
284 characterization of a SARS-CoV-2 isolate in mild COVID-19 patients during acute  
285 phase of infection. *medRxiv*, 2020.2011.2005.20226621 (2020).
- 286 4. Anantharaj, A., *et al.* Resolution of viral load in mild COVID-19 patients is  
287 associated with both innate and adaptive immune responses. *Journal of Clinical*  
288 *Virology* **146**, 105060 (2022).
- 289 5. Thiruvengadam, R., *et al.* Effectiveness of ChAdOx1 nCoV-19 vaccine against  
290 SARS-CoV-2 infection during the delta (B.1.617.2) variant surge in India: a test-  
291 negative, case-control study and a mechanistic study of post-vaccination immune  
292 responses. *The Lancet Infectious Diseases* (2021).
- 293 6. Gu, H., *et al.* Probable Transmission of SARS-CoV-2 Omicron Variant in  
294 Quarantine Hotel, Hong Kong, China, November 2021. *Emerg Infect Dis* **28**(2021).
- 295 7. Medigeshi, G., *et al.* Sub-optimal Neutralisation of Omicron (B.1.1.529) Variant by  
296 Antibodies induced by Vaccine alone or SARS-CoV-2 Infection plus Vaccine  
297 (Hybrid Immunity) post 6-months. *medRxiv*, 2022.2001.2004.22268747 (2022).

- 298 8. Kumar, P., *et al.* Integrated genomic view of SARS-CoV-2 in India. *Wellcome Open*  
299 *Res* **5**, 184 (2020).
- 300 9. Cubuk, J., *et al.* The SARS-CoV-2 nucleocapsid protein is dynamic, disordered,  
301 and phase separates with RNA. *Nat Commun* **12**, 1936 (2021).
- 302 10. Stadlbauer, D., *et al.* SARS-CoV-2 Seroconversion in Humans: A Detailed Protocol  
303 for a Serological Assay, Antigen Production, and Test Setup. *Curr Protoc Microbiol*  
304 **57**, e100 (2020).
- 305 11. Cele, S., *et al.* SARS-CoV-2 Omicron has extensive but incomplete escape of  
306 Pfizer BNT162b2 elicited neutralization and requires ACE2 for infection. *medRxiv*  
307 (2021).
- 308 12. Dejnirattisai, W., *et al.* Reduced neutralisation of SARS-CoV-2 omicron B.1.1.529  
309 variant by post-immunisation serum. *Lancet* (2021).
- 310 13. Edara, V.V., *et al.* Infection and Vaccine-Induced Neutralizing-Antibody  
311 Responses to the SARS-CoV-2 B.1.617 Variants. *N Engl J Med* **385**, 664-666  
312 (2021).
- 313 14. Stamatatos, L., *et al.* mRNA vaccination boosts cross-variant neutralizing  
314 antibodies elicited by SARS-CoV-2 infection. *Science* (2021).
- 315 15. Leier, H.C., *et al.* Previously infected vaccinees broadly neutralize SARS-CoV-2  
316 variants. *medRxiv*, 2021.2004.2025.21256049 (2021).
- 317 16. Cromer, D., *et al.* Neutralising antibody titres as predictors of protection against  
318 SARS-CoV-2 variants and the impact of boosting: a meta-analysis. *Lancet Microbe*  
319 **3**, e52-e61 (2022).

- 320 17. Dan, J.M., *et al.* Immunological memory to SARS-CoV-2 assessed for up to 8  
321 months after infection. *Science* **371**(2021).
- 322 18. Kannian, P., Mahanathi, P., Ashwini, V. & Kumarasamy, N. Booster and anergic  
323 effects of the Covishield vaccine among healthcare workers in South India.  
324 *medRxiv*, 2021.2008.2004.21261601 (2021).
- 325 19. Cheng, S.M.S., *et al.* Neutralizing antibodies against the SARS-CoV-2 Omicron  
326 variant following homologous and heterologous CoronaVac or BNT162b2  
327 vaccination. *Nature Medicine* (2022).
- 328 20. Angkasekwinai, N., *et al.* The immunogenicity against variants of concern and  
329 reactogenicity of four COVID-19 booster vaccinations following CoronaVac or  
330 ChAdOx1 nCoV-19 primary series. *medRxiv*, 2021.2011.2029.21266947 (2022).

331

## 332 **FIGURE LEGEND**

333 **Figure 1: Antibody boosting after a single dose of BBV152 vaccination.** Serum levels  
334 of antibodies against (A) SARS-CoV-2 RBD and (B) N protein was estimated by  
335 quantitative ELISA after a single dose of BBV152 vaccine in baseline and post-  
336 vaccination samples collected 3-4 weeks later. Data was expressed as Binding Antibody  
337 Units (BAU)/ml (international units). (C) FRNT<sub>50</sub> titers in RBD ELISA-positive samples for  
338 the ancestral B.6 lineage (WT) and the delta variant (B1.617.2) in baseline and post-  
339 single dose vaccination samples. (D) FRNT<sub>50</sub> titers in RBD ELISA-negative samples for  
340 the ancestral B.6 lineage (WT) and the delta variant (B1.617.2) in baseline and post-  
341 single dose vaccination samples. (E) Spearman correlation (r) between baseline FRNT<sub>50</sub>  
342 titers and fold-change observed after single-dose of BBV152. (F and G) FRNT<sub>50</sub> titers for



343 the delta variant (B1.617.2) and omicron (1.1.529) variant in baseline and post-single  
344 dose vaccination samples. LLOQ: Lower limit of quantitation of the assay. Two-tailed t  
345 test P values are indicated by - \*  $p < 0.05$ ; \*\*  $p < 0.01$ ; \*\*\*  $p < 0.001$ ; \*\*\*\*  $p < 0.0001$ ; ns -  
346 not significant.

347

Figure 1

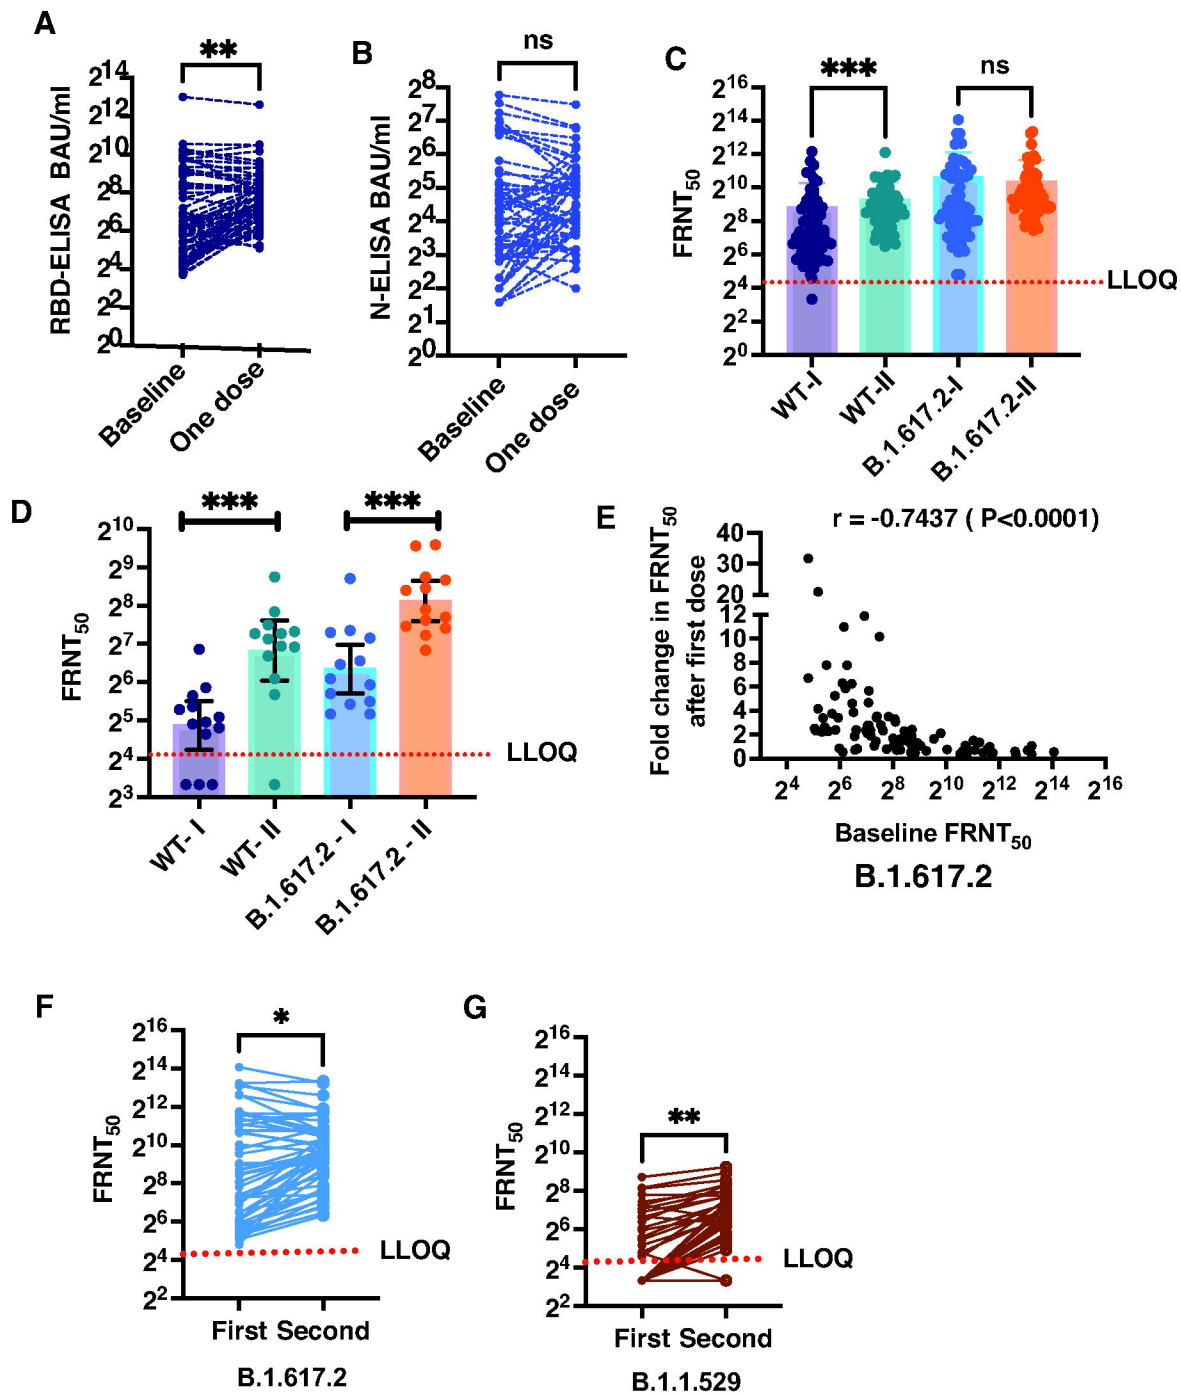

Source: https://medrxiv.org/content/10.1101/2022.02.07.22270612.full.pdf
